# Supplementary material for: Deep oceanic submarine fieldwork with undergraduate students: an immersive experience with the Minerve software
Source: Copernicus journal article supplement (doi:10.5194/se-12-2789-2021), 2021-12-20
Supplement: Supplementary file 1 [file se-12-2789-2021-supplement.zip]

Archive with 3 entries (3 files):
- labsession_script.pdf
- se-12-2789-2021-supplement-title-page.pdf
- LabSession_Saintes.zip
