# Supplementary material for: Deep oceanic submarine fieldwork with undergraduate students: an immersive experience with the Minerve software
Source: Copernicus journal article supplement (doi:10.5194/se-12-2789-2021), 2021-12-20
Supplement: Supplementary file 1 [file se-12-2789-2021-supplement.zip › se-12-2789-2021-supplement-title-page.pdf]

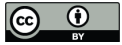

*Supplement of*

**Deep oceanic submarine fieldwork with undergraduate students: an immersive experience with the Minerve software**

**Marianne Métois et al.**

*Correspondence to:* Marianne Métois ([marianne.metois@univ-lyon1.fr](mailto:marianne.metois@univ-lyon1.fr))

- [se-12-2789-2021-supplement-title-page.pdf](#)
- [LabSession\\_Saintes.zip](#)
- [labsession\\_script.pdf](#)

The copyright of individual parts of the supplement might differ from the article licence.
